# Supplementary material for: A New Lignan from Annona squamosa L. (Annonaceae) Demonstrates Vasorelaxant Effects In Vitro
Source: MDPI journal article supplement (doi:10.3390/molecules28114256), 2023-05-23

**Figure S1** HR-ESI spectra of esquamosan

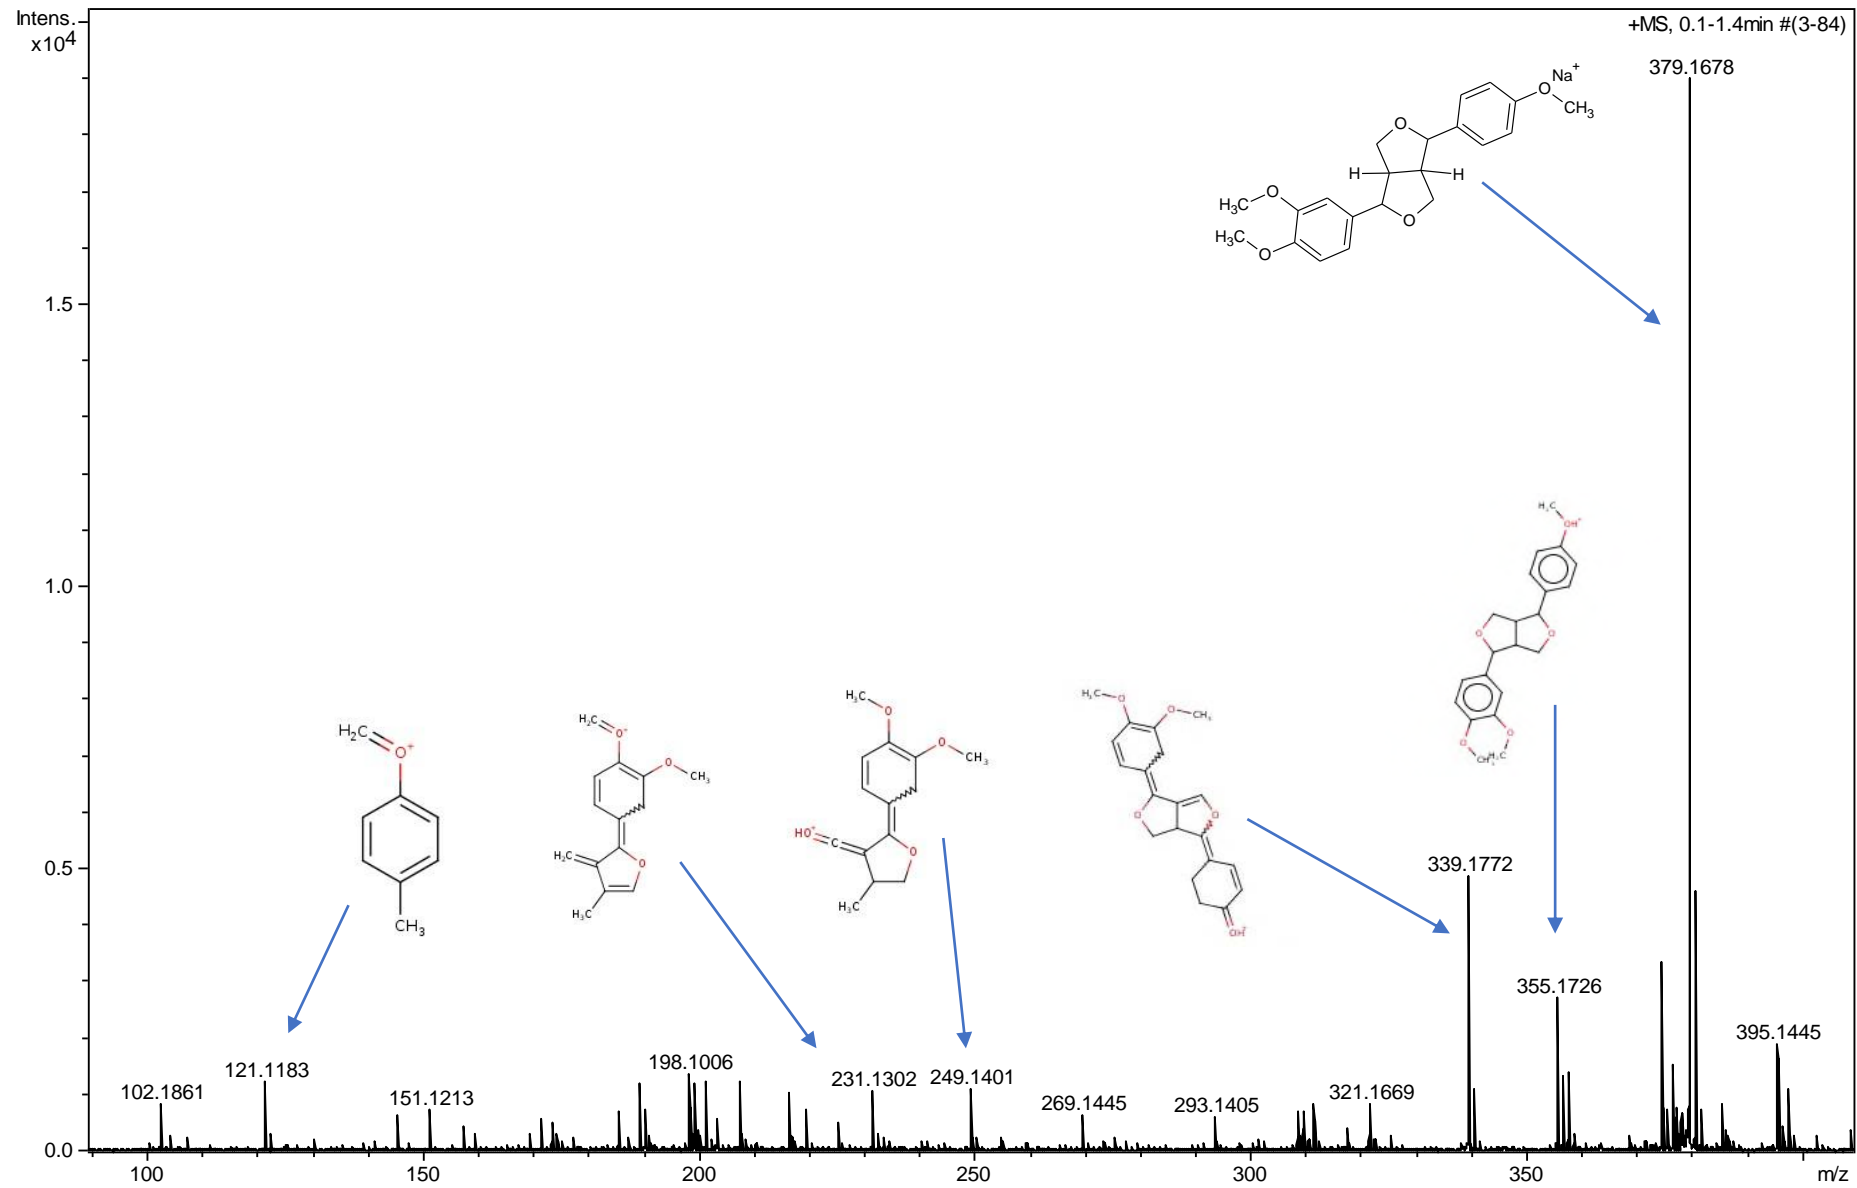

Figure S2  $^1\text{H}$  NMR spectrum of esquamosan

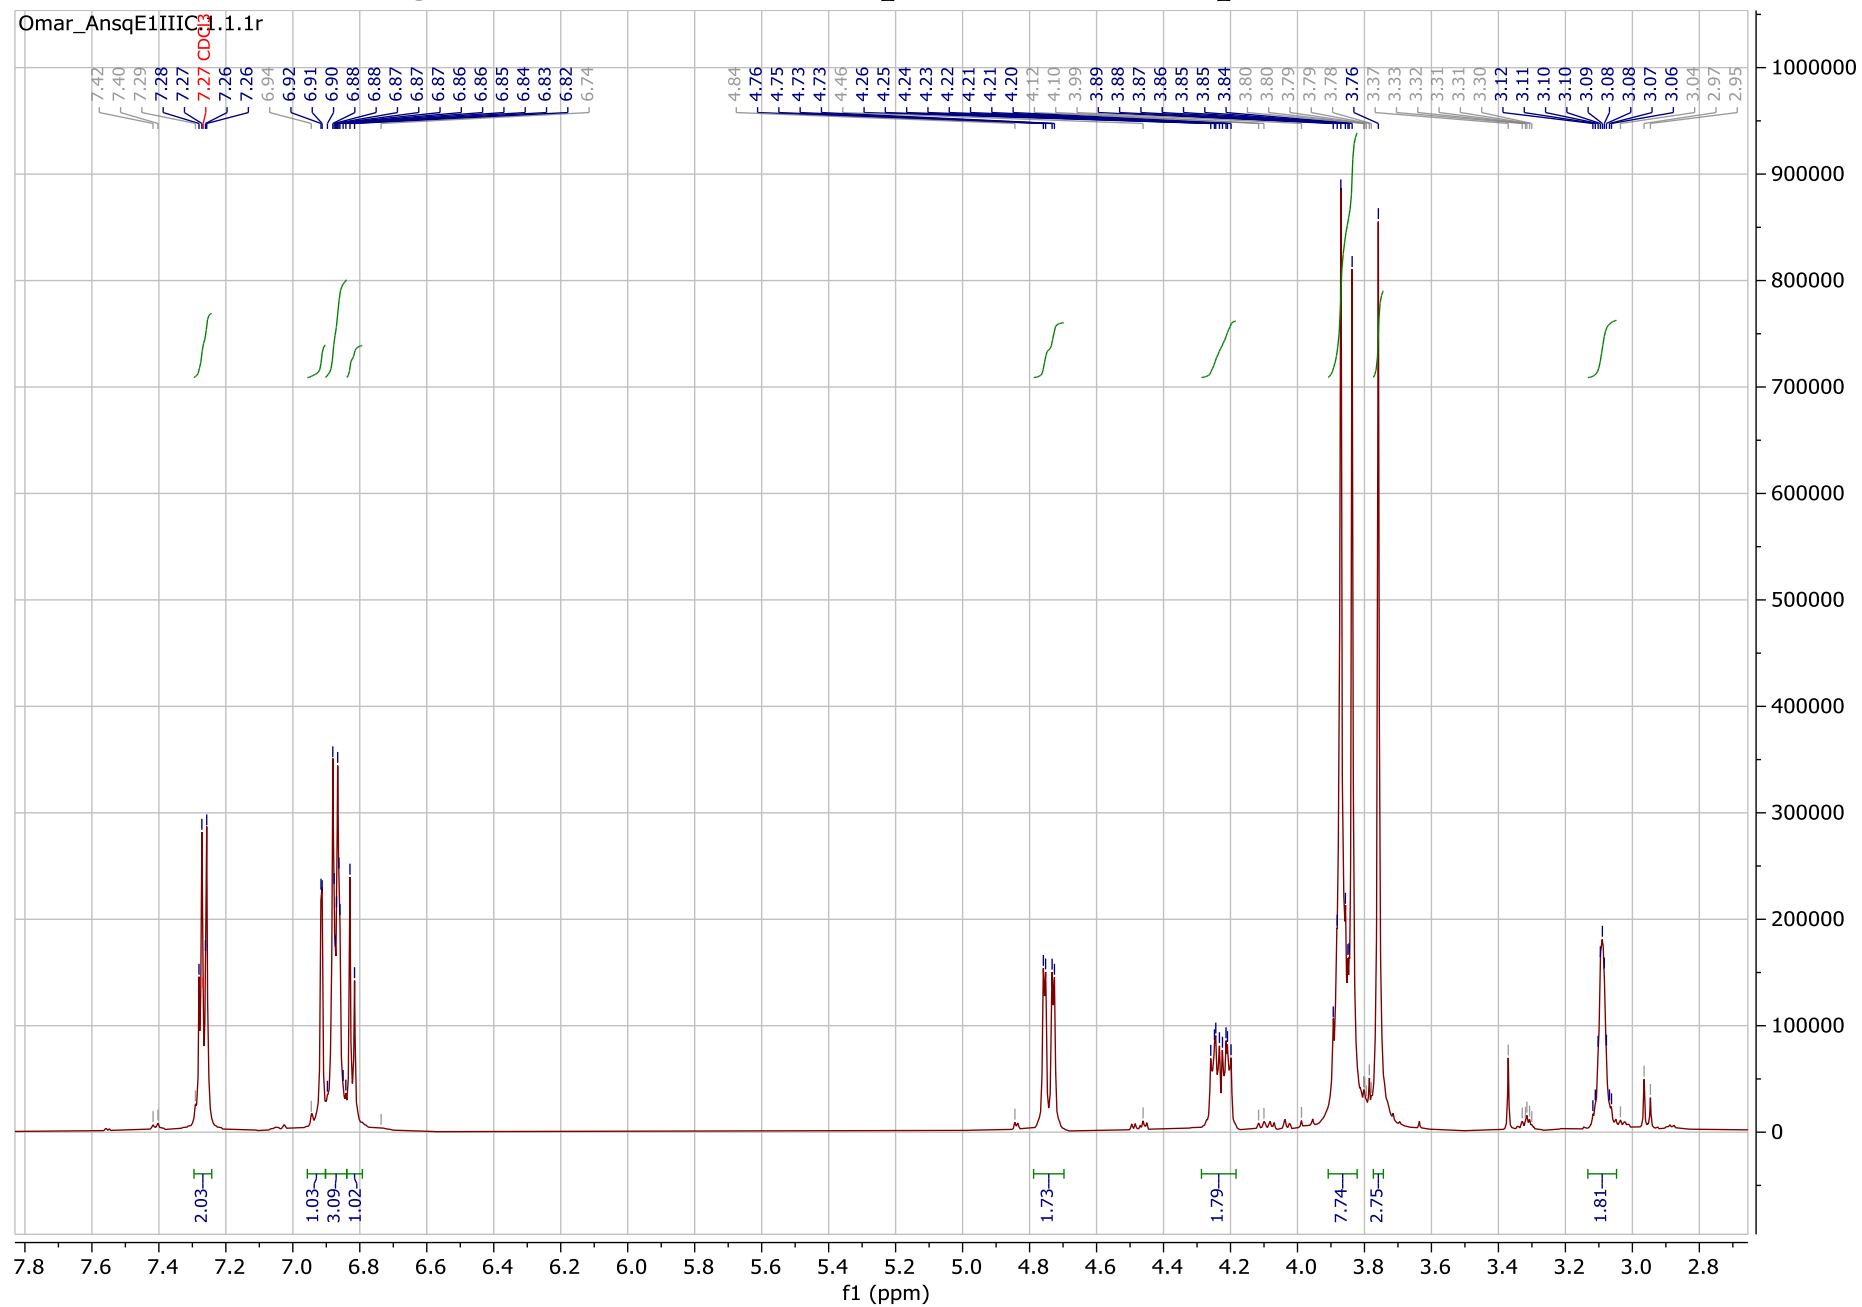

**Figure S3**  $^{13}\text{C}$  NMR and DEPT 135 and  $^{13}\text{C}$  NMR spectrum of esquamosan

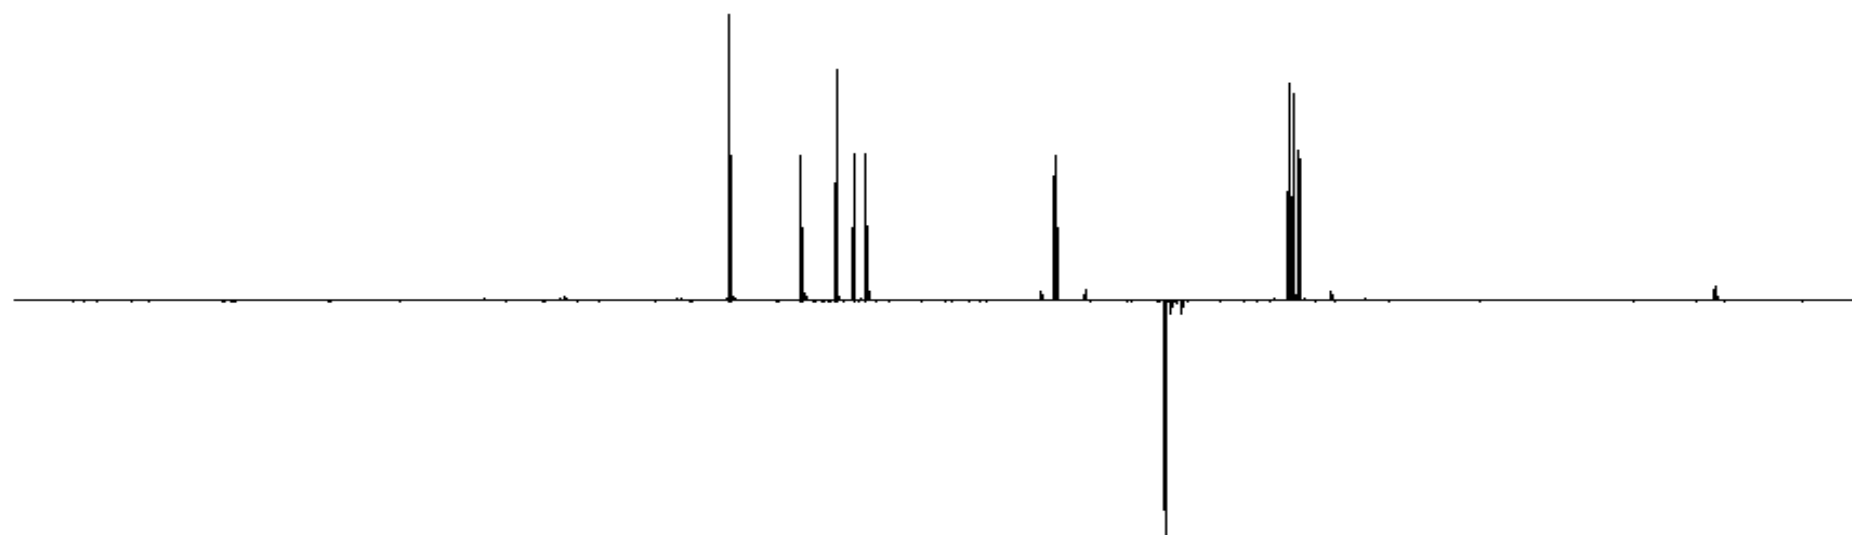

O. Estrada / AnsqEJIIIC

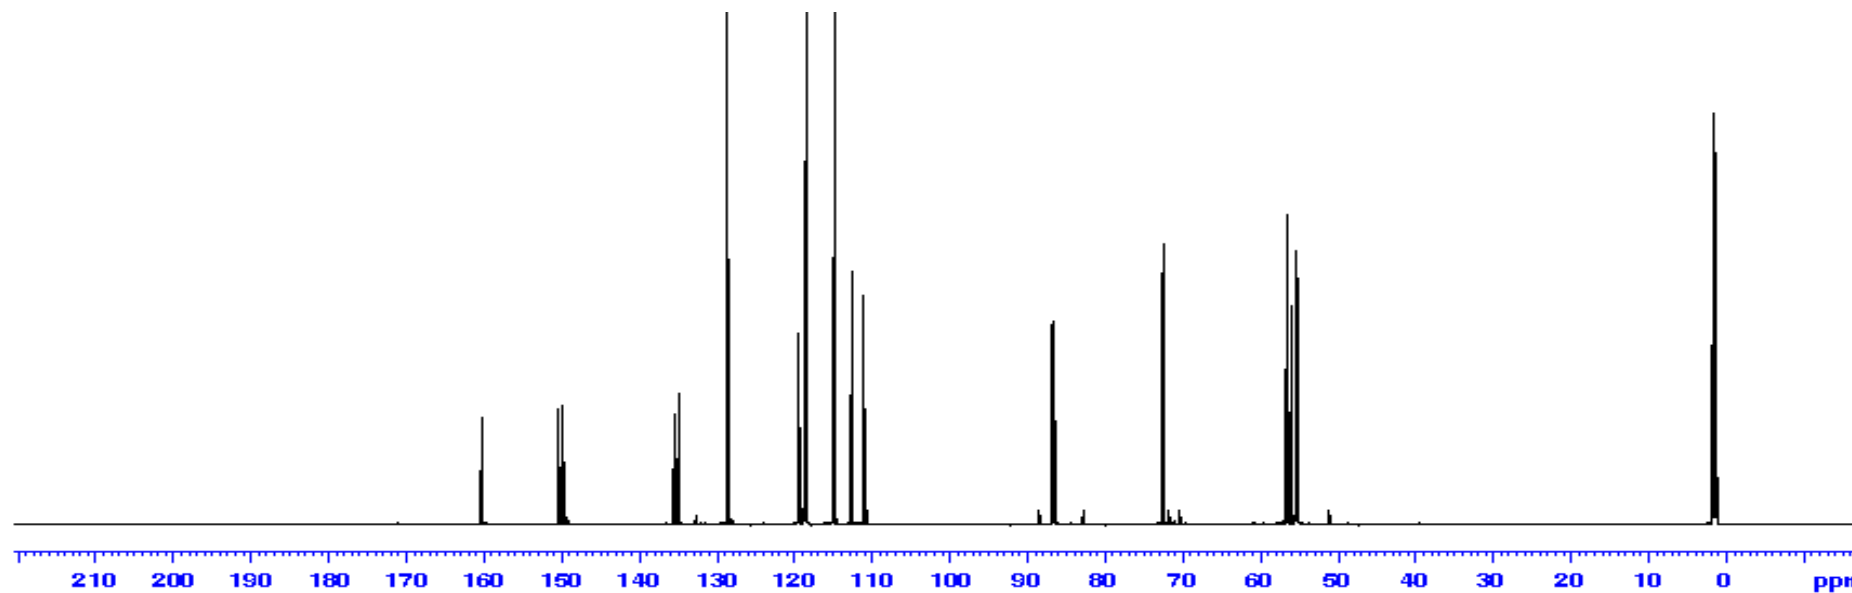

**Figure S4** HSQC spectrum of esquamosan

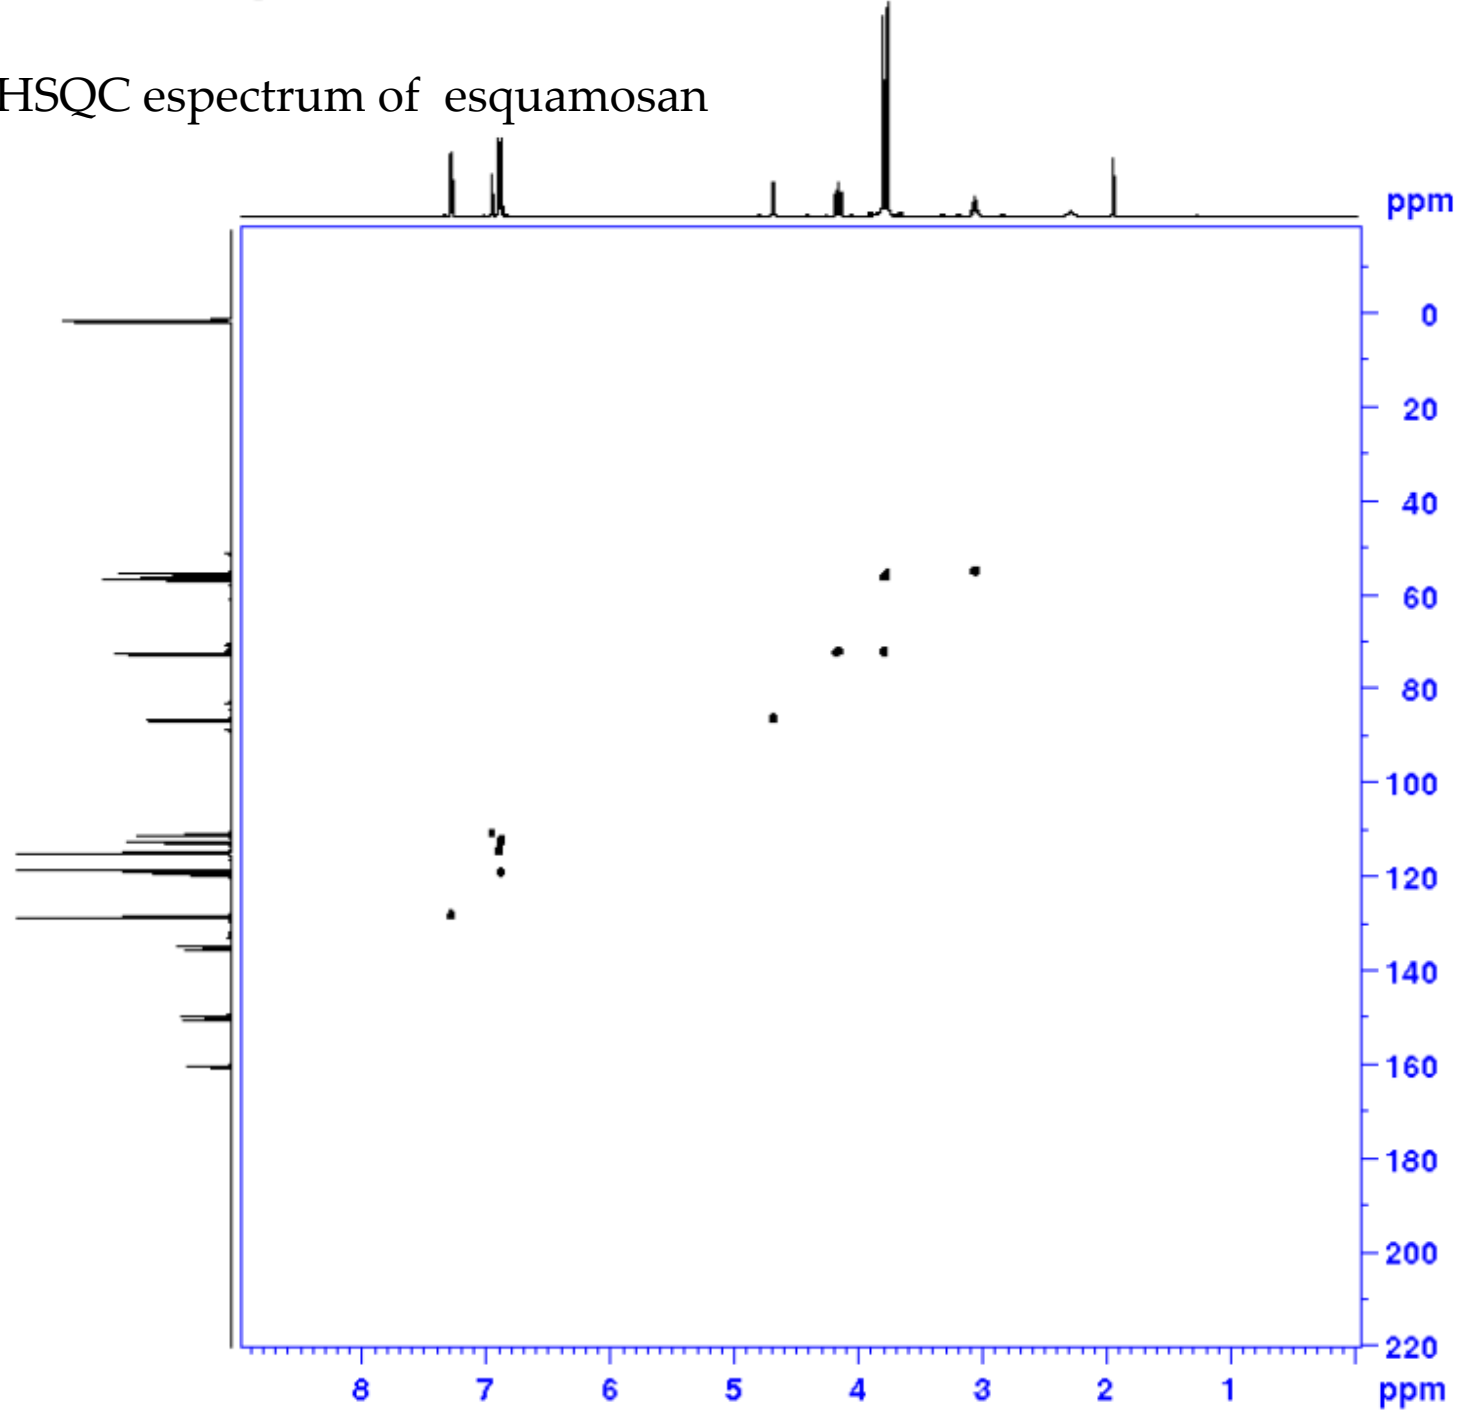

Figure S5 HMBC spectrum of esquamosan

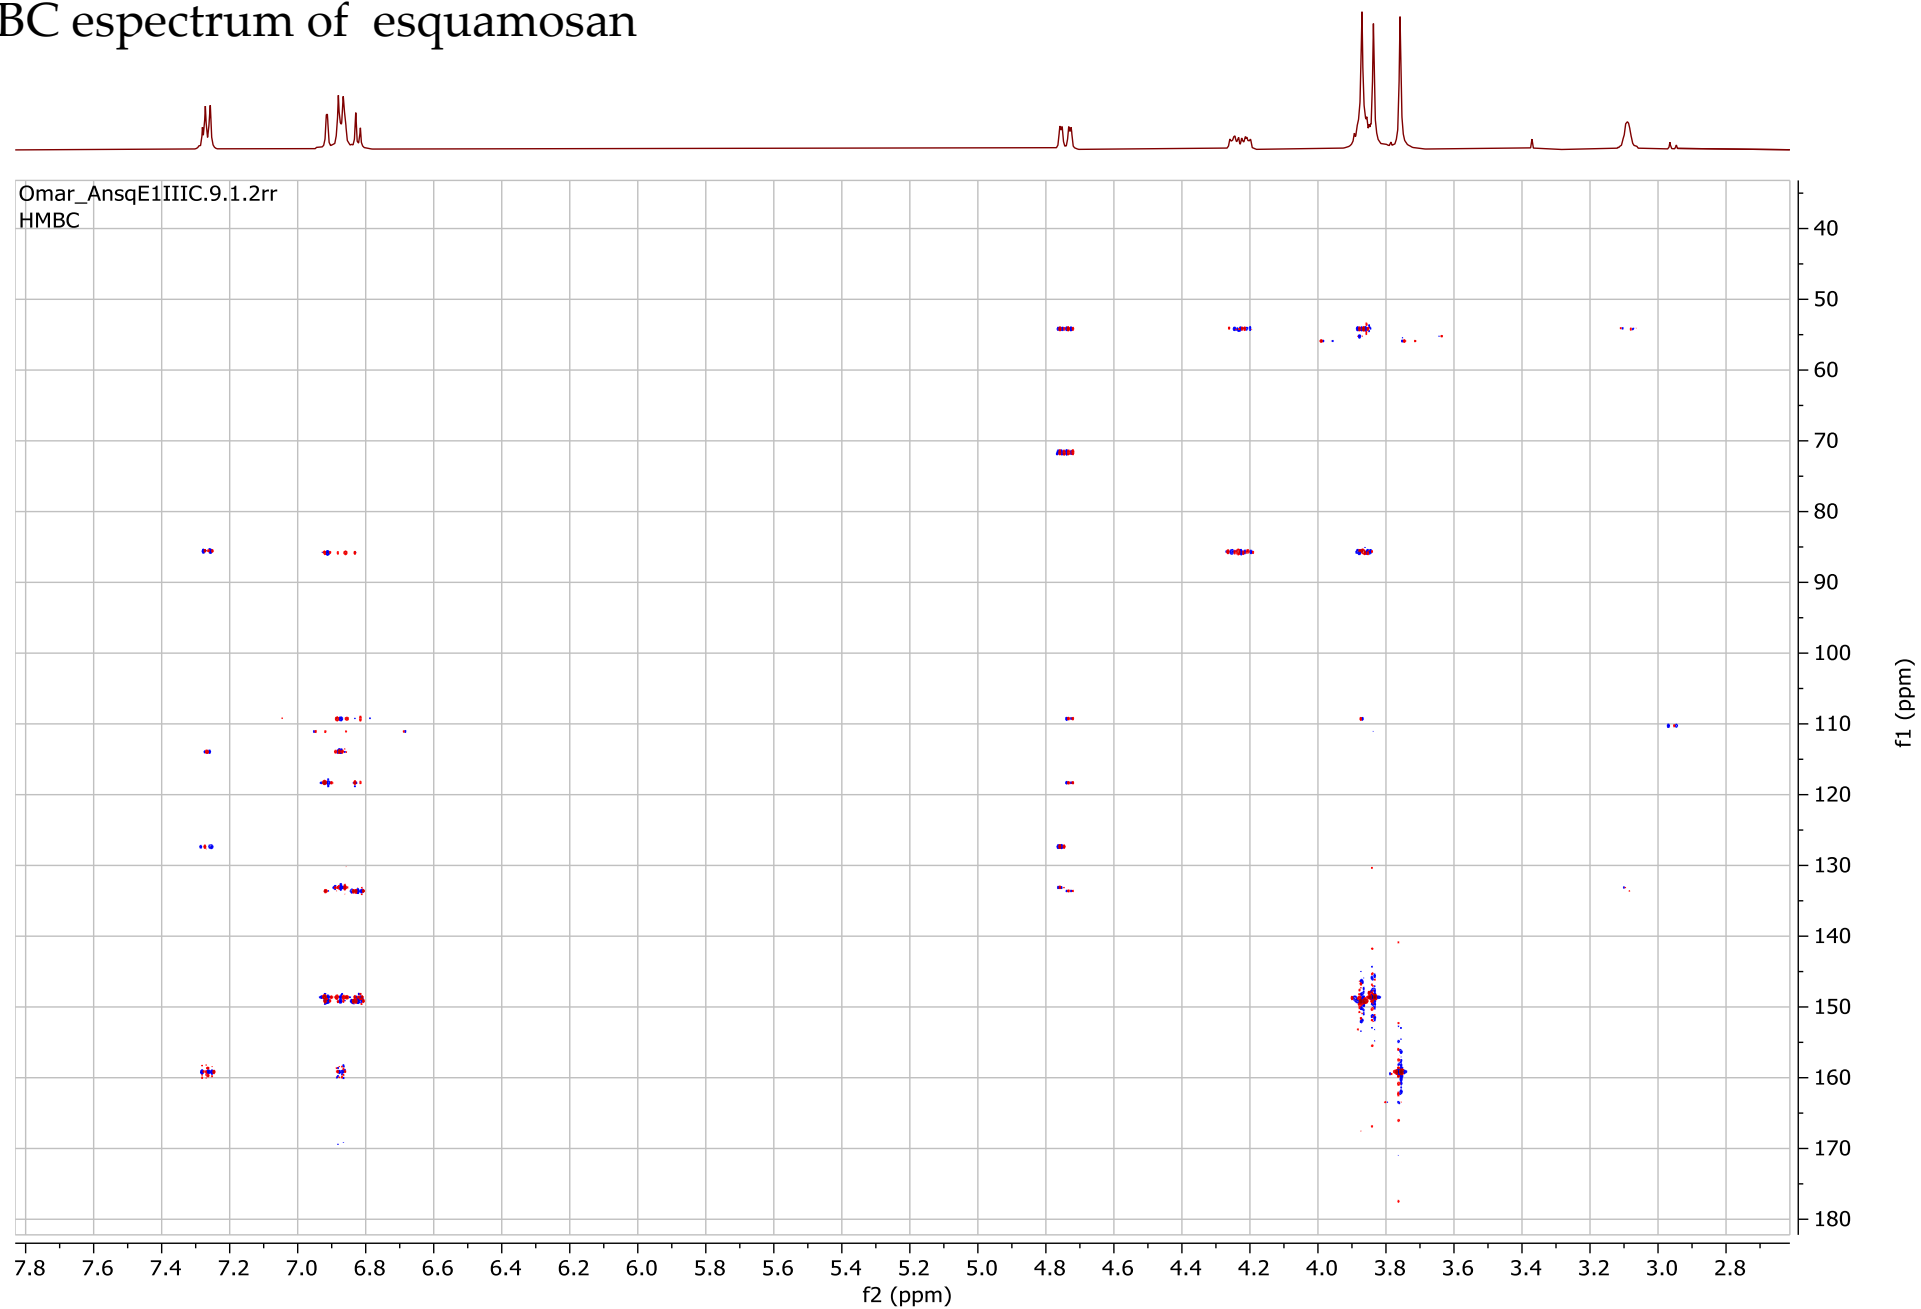

Figure S6 NOESY spectrum of esquamosan

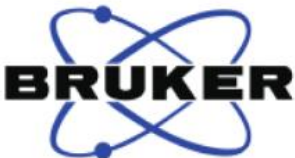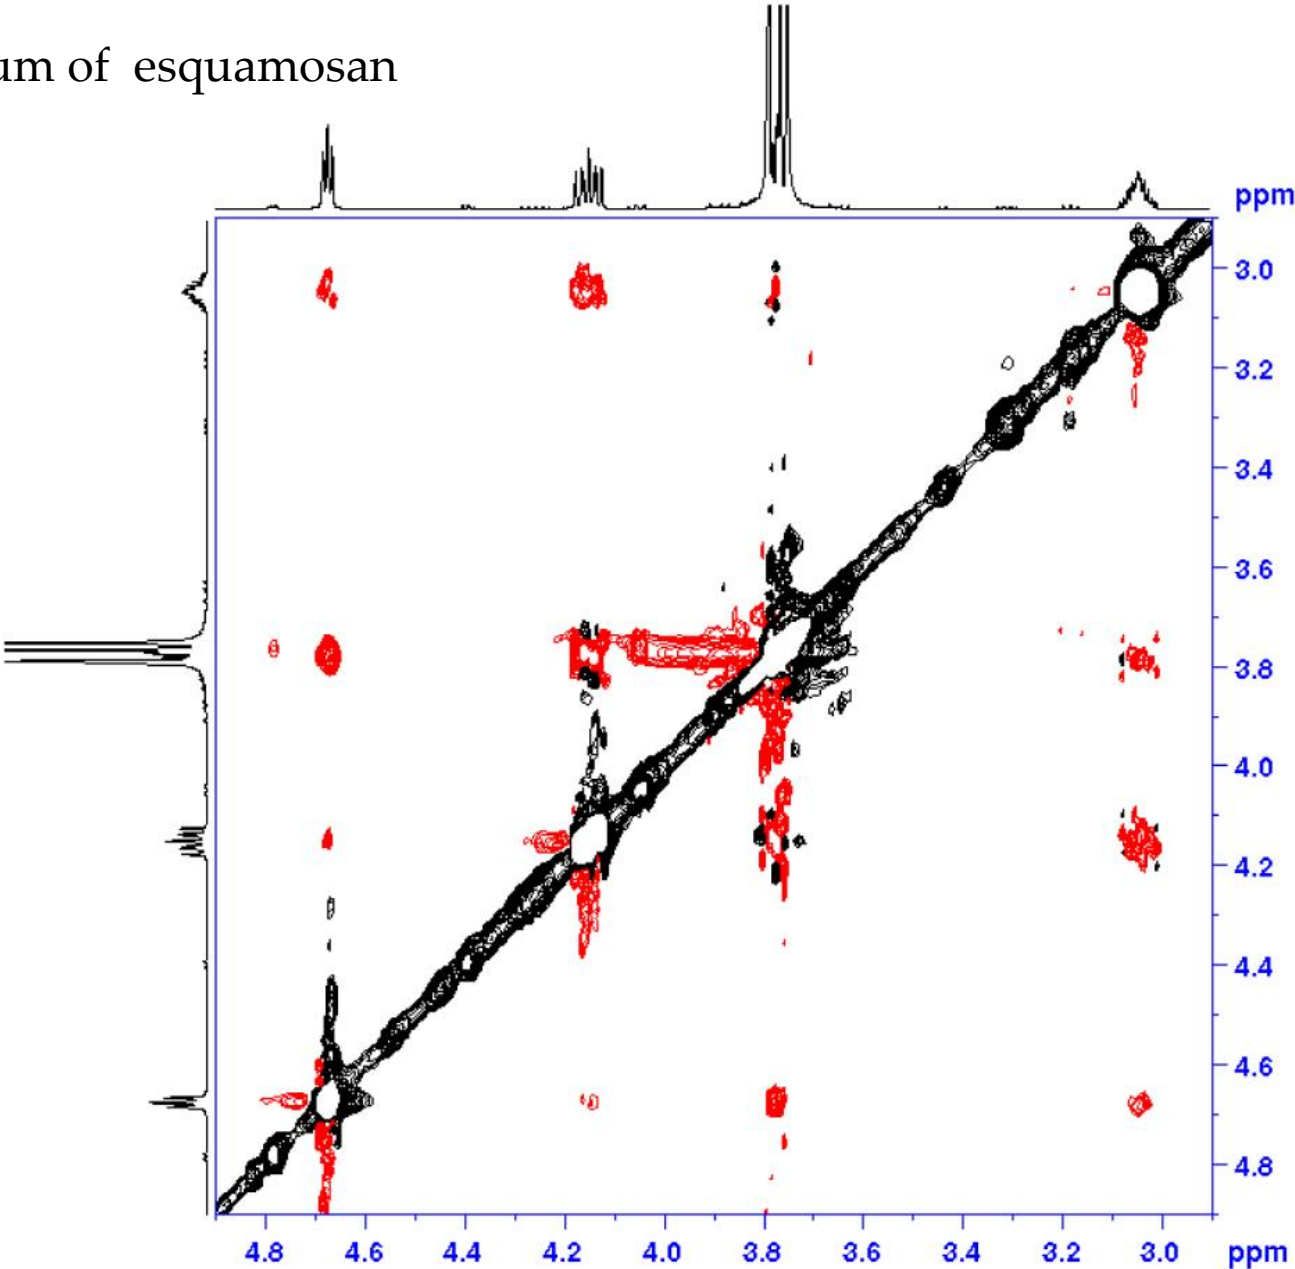

**Figure S7** COSY spectrum of esquamosan

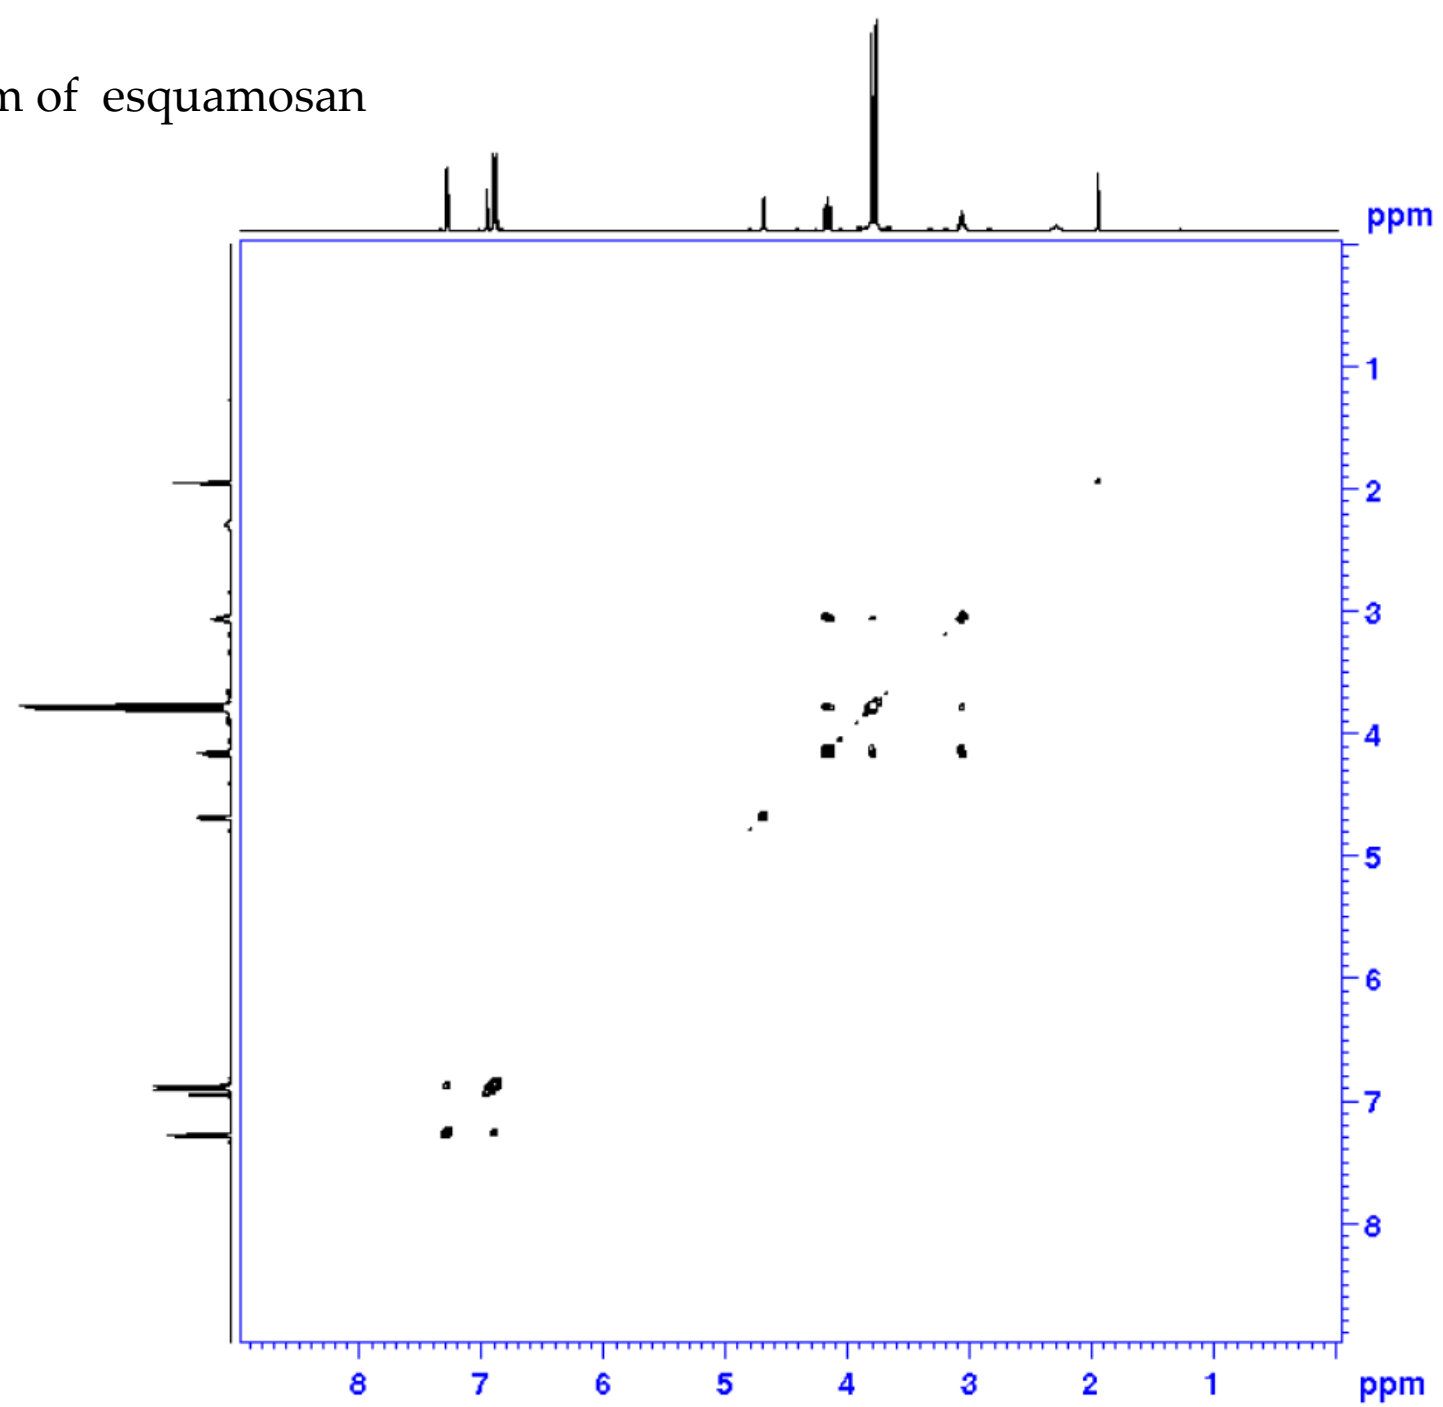

Supplement: s1 [file s1]
